# Supplementary material
Source: PubMed Central journal article supplement (PMC7445761)
Supplement: ysz008_supp.pdf [file ysz008_supp.pdf]

SUPPLEMENT

Supplementary Tables

**Table S1.** Primers used in this study

|             |                                                                             |                                                                         |
|-------------|-----------------------------------------------------------------------------|-------------------------------------------------------------------------|
| pBDPfw      | CATCTAGTACTTTCCTGTGTGATTG                                                   | primers amplifying pBDP_RFP_GFP plasmid, apart from the <i>rfp</i> gene |
| pBDPprev    | TAATAACGCTGATAGTGCTAGTG                                                     | primers amplifying pBDP_RFP_GFP plasmid, apart from the <i>rfp</i> gene |
| Km3         | CACTAGCACTATCAGCGTTATTAGA<br>AGAACTCGTCAAGAAGGC                             | primers amplifying <i>Km</i> gene of pST76-K                            |
| Km5         | CAATCACACAGGAAAGTACTAGATG<br>ATTGAACAAGATGGATTG                             | primers amplifying <i>Km</i> gene of pST76-K                            |
| cycA1       | CTGATGCCGGTAGGTTCT                                                          | primers amplifying <i>cycA</i> gene                                     |
| cycA2       | GCCCATCCAGCATGATA                                                           | primers amplifying <i>cycA</i> gene                                     |
| bglR1       | GTGGCGATGAGCTGGAT                                                           | primers for checking size of <i>bgl</i> regulatory region               |
| bglR2       | CCGACTTCACCAGTATTC                                                          | primers for checking size of <i>bgl</i> regulatory region               |
| VF2         | TGCCACCTGACGTCTAAGAA                                                        | primers amplifying the <i>km-gfp</i> cassette of pBDP_Km_GFP5           |
| VR          | ATTACCGCCTTTGAGTGAGC                                                        | primers amplifying the <i>km-gfp</i> cassette of pBDP_Km_GFP5           |
| IS1A1       | TCGCTGTCGTTCTCA                                                             | IS1 outward primer                                                      |
| IS1A2       | AAGCCACTGGAGCAC                                                             | IS1 outward primer                                                      |
| IS1F1       | GGTAATGCTGCCAATTACT                                                         | IS1F inward primer                                                      |
| UK1R        | TCGCAGGCATACCATCAA                                                          | IS2 outward primer                                                      |
| UK2R        | CAGACGGGTTAACGGCA                                                           | IS2 outward primer                                                      |
| IS3ki1      | CTGCGCCAGTTGTAGAGTTG                                                        | IS3 outward primer                                                      |
| IS3ki2      | ATAATGCCTGCGTGAAAGC                                                         | IS3 outward primer                                                      |
| IS4ki1      | GCATGATGTCCAGGCGATTG                                                        | IS4 outward primer                                                      |
| is4ki2      | ACAAACCGGCGATAAACTC                                                         | IS4 outward primer                                                      |
| IS5ki1      | GACAGTTCGGCTTCGTGA                                                          | IS5 outward primer                                                      |
| IS5ki2      | GCTCGATGACTTCCACCA                                                          | IS5 outward primer                                                      |
| IS5Y1       | GGAAGGTGCGAATAAGCAGG                                                        | IS5Y inward primer                                                      |
| IS10ki1     | CGTGCCAAGCCAACGTTA                                                          | IS10 outward primer                                                     |
| IS10ki2     | TGCGGCATTCTGGCTACA                                                          | IS10 outward primer                                                     |
| IS150ki1    | ACGTGCCGAGATGATCCT                                                          | IS150 outward primer                                                    |
| IS150ki2    | CAGACCTATATGCCTCGT                                                          | IS150 outward primer                                                    |
| IS150Crisp+ | AAACGGGGCTATTCCATTTTCATCGT<br>CCAACAAAAGTTTTAGAGCTATGCT<br>GTTTTGAATGGTCCCA | IS150-specific spacer, positive strand                                  |

|                               |                                                                                                                                                                                                                                                                                                                                        |                                                                                                            |
|-------------------------------|----------------------------------------------------------------------------------------------------------------------------------------------------------------------------------------------------------------------------------------------------------------------------------------------------------------------------------------|------------------------------------------------------------------------------------------------------------|
| IS150Crisp-                   | GTTTTGGGACCATTCAAACAGCAT<br>AGCTCTAAACTTTTGTGGACGAT<br>GAAATGGAATAGCCCC                                                                                                                                                                                                                                                                | IS150-specific spacer, negative strand                                                                     |
| IS1;IS5;IS3-specific cassette | CATGGTCTCTAAACATGCTGCCAAC<br>TACTGATTTAGTGTATGAGTTTTAG<br>AGCTATGCTGTTTTGAATGGTCCCA<br>AAACGGCTCCAGATGACAAACATGA<br>TCTCATATCGTTTTAGAGCTATGCTG<br>TTTTGAATGGTCCCAAACACGCGG<br>CTAAGTGAGTAACTCTCAGTCAGG<br>TTTTAGAGCTATGCTTTTTGAATG<br>GTCCCAAACGGGGCTATTCCATTT<br>CATCGTCCAACAAAAGTTTTAGAGC<br>TATGCTGTTTTGAATGGTCCAAAA<br>CTGAGACCGTT | Synthetic gene cassette encoding CRSIPR spacers targeting IS1, IS5 and IS3 for cloning into pCRISPathBrick |

**Table S2.** Genes significantly down-regulated by the presence of pCRIS

|       | logFC <sup>1</sup> | AveExpr <sup>2</sup> | t      | P Value  | adjusted P Value | B        | fold change | gene name   | explanation of downregulation     |
|-------|--------------------|----------------------|--------|----------|------------------|----------|-------------|-------------|-----------------------------------|
| b0022 | -2.14494           | 5.679112             | -30.97 | 1.4E-10  | 7.86E-08         | 15.01269 | 4.42        | <i>InsA</i> | <b>IS1A</b>                       |
| b0259 | -4.73737           | 9.056314             | -85.72 | 1.3E-14  | 5.84E-11         | 22.55554 | 26.67       | <i>InsH</i> | <b>IS5</b>                        |
| b0373 | -8.50954           | -0.27977             | -8.684 | 1.02E-05 | 0.000712         | 1.824746 | 364.44      | <i>InsE</i> | <b>IS3</b>                        |
| b0450 | -1.01268           | 4.257646             | -5.04  | 0.000664 | 0.01572          | -0.75015 | 2.02        | <i>glnK</i> |                                   |
| b0553 | -1.82978           | 8.296067             | -20.99 | 4.69E-09 | 1.62E-06         | 11.51646 | 3.55        | <i>nmpC</i> | IS5 downstream of gene            |
| b0652 | -3.16056           | 4.52066              | -23.4  | 1.77E-09 | 7.95E-07         | 12.34931 | 8.94        | <i>gtlL</i> | IS5 upstream of <i>gtl</i> operon |
| b0653 | -2.86822           | 3.698821             | -22.06 | 3E-09    | 1.23E-06         | 11.57504 | 7.30        | <i>gtlK</i> | IS5 upstream of <i>gtl</i> operon |
| b0654 | -3.20827           | 3.96357              | -21.22 | 4.26E-09 | 1.6E-06          | 11.34508 | 9.24        | <i>gtlJ</i> | IS5 upstream of <i>gtl</i> operon |
| b0655 | -4.18404           | 6.446123             | -65.45 | 1.53E-13 | 1.53E-10         | 20.12965 | 18.18       | <i>gtlI</i> | IS5 upstream of <i>gtl</i> operon |
| b0987 | -1.08532           | 1.827631             | -5.97  | 0.000196 | 0.005965         | 1.110339 | 2.12        | <i>gfcA</i> | lying back-to-back with IS1D      |
| b1243 | -3.43876           | 10.08949             | -69.72 | 8.58E-14 | 1.53E-10         | 21.46587 | 10.84       | <i>oppA</i> | IS5 upstream of <i>opp</i> operon |
| b1244 | -3.60124           | 6.144254             | -59.9  | 3.44E-13 | 2.58E-10         | 19.6422  | 12.14       | <i>oppB</i> | IS5 upstream of <i>opp</i> operon |
| b1245 | -3.50465           | 6.772219             | -58.05 | 4.58E-13 | 2.94E-10         | 19.82969 | 11.35       | <i>oppC</i> | IS5 upstream of <i>opp</i> operon |
| b1246 | -3.4995            | 7.152826             | -67.14 | 1.21E-13 | 1.53E-10         | 20.87308 | 11.31       | <i>oppD</i> | IS5 upstream of <i>opp</i> operon |
| b1247 | -3.38441           | 7.279867             | -64.67 | 1.7E-13  | 1.53E-10         | 20.71187 | 10.44       | <i>oppF</i> | IS5 upstream of <i>opp</i> operon |
| b2028 | -1.58354           | 4.514402             | -20.16 | 6.75E-09 | 2.17E-06         | 11.23268 | 3.00        | <i>ugd</i>  | IS5 upstream                      |
| b2029 | -1.49571           | 9.289028             | -29.69 | 2.05E-10 | 1.02E-07         | 14.72943 | 2.82        | <i>gnd</i>  | IS5 upstream                      |
| b2725 | -1.3485            | 3.084375             | -6.623 | 8.94E-05 | 0.003467         | 1.702269 | 2.55        | <i>hycA</i> |                                   |
| b4294 | -3.46957           | 2.565652             | -11.85 | 7.35E-07 | 0.00011          | 6.367982 | 11.08       | <i>insA</i> | <b>IS1F</b>                       |
| b4570 | -1.33887           | 3.727483             | -11.28 | 1.12E-06 | 0.000152         | 6.12785  | 2.53        | <i>lomR</i> | IS5 interrupting                  |
| b4571 | -1.54539           | 6.131028             | -14.78 | 1.07E-07 | 2.82E-05         | 8.297627 | 2.92        | <i>wbbl</i> | IS5 interrupting                  |

<sup>1</sup> logFC: log2 of fold change in read frequencies

<sup>2</sup> AveExpr: Average of expression levels

**Table S3.** Genes significantly up-regulated by the presence of pCRIS

|       | logFC <sup>1</sup> | AveExpr <sup>2</sup> | t        | P Value  | adjusted P Value | B        | fold change | gene name   | IS in vicinity                  |
|-------|--------------------|----------------------|----------|----------|------------------|----------|-------------|-------------|---------------------------------|
| b0297 | 1.037752           | 0.886165             | 4.341705 | 0.0018   | 0.030644         | -0.96538 | 2.05303     | <i>eaeH</i> | directly upstream of IS3        |
| b1319 | 1.044211           | 1.168833             | 4.128482 | 0.002474 | 0.037844         | -1.31477 | 2.06224     | <i>ompG</i> |                                 |
| b1409 | 1.064929           | 0.913986             | 4.55035  | 0.001326 | 0.02486          | -0.67252 | 2.09207     | <i>ynbB</i> | IS2, IS30 close in Rac prophage |
| b1503 | 1.159621           | 0.612153             | 4.375767 | 0.001711 | 0.029723         | -0.89045 | 2.23399     | <i>ydeR</i> |                                 |
| b2055 | 1.018434           | 0.444058             | 3.879706 | 0.003615 | 0.047455         | -1.58839 | 2.02572     | <i>wcaE</i> | 26 kbp from IS5                 |
| b2357 | 1.835212           | -0.01028             | 4.89368  | 0.000814 | 0.017634         | -0.20043 | 3.56824     | <i>yfdT</i> |                                 |
| b3579 | 1.099776           | 1.467598             | 4.643391 | 0.00116  | 0.022687         | -0.61056 | 2.14321     | <i>yiaO</i> |                                 |
| b3581 | 1.005112           | 0.948833             | 4.204709 | 0.002206 | 0.034748         | -1.17104 | 2.0071      | <i>sgbH</i> |                                 |
| b4354 | 1.725097           | 7.904521             | 7.834528 | 2.37E-05 | 0.00127          | 2.348302 | 3.30602     | <i>lgoR</i> |                                 |
| b4675 | 2.316451           | -3.36962             | 4.009705 | 0.002962 | 0.041979         | -1.73829 | 4.98105     | <i>yoaJ</i> |                                 |

<sup>1</sup> logFC: log2 of fold change in read frequencies

<sup>2</sup> AveExpr: Average of expression levels

**Table S4.** Mutations identified in the *km-gfp* cassette of the pBDP\_Km\_GFP plasmid propagated in *E. coli* JM107MA2

|                  | pCRISPath | pCRIS     |
|------------------|-----------|-----------|
| point mutation   | 9         | 14        |
| <b>insertion</b> | <b>21</b> | <b>13</b> |
| deletion         | 2         | 5         |
| total            | 32        | 32        |

X<sup>2</sup> test:

p<0.2

**p<0.05**

p<0.3

IS-specific PCR identified all insertion mutants as IS2 insertions into the *km-gfp* cassette.

Supplementary Figures

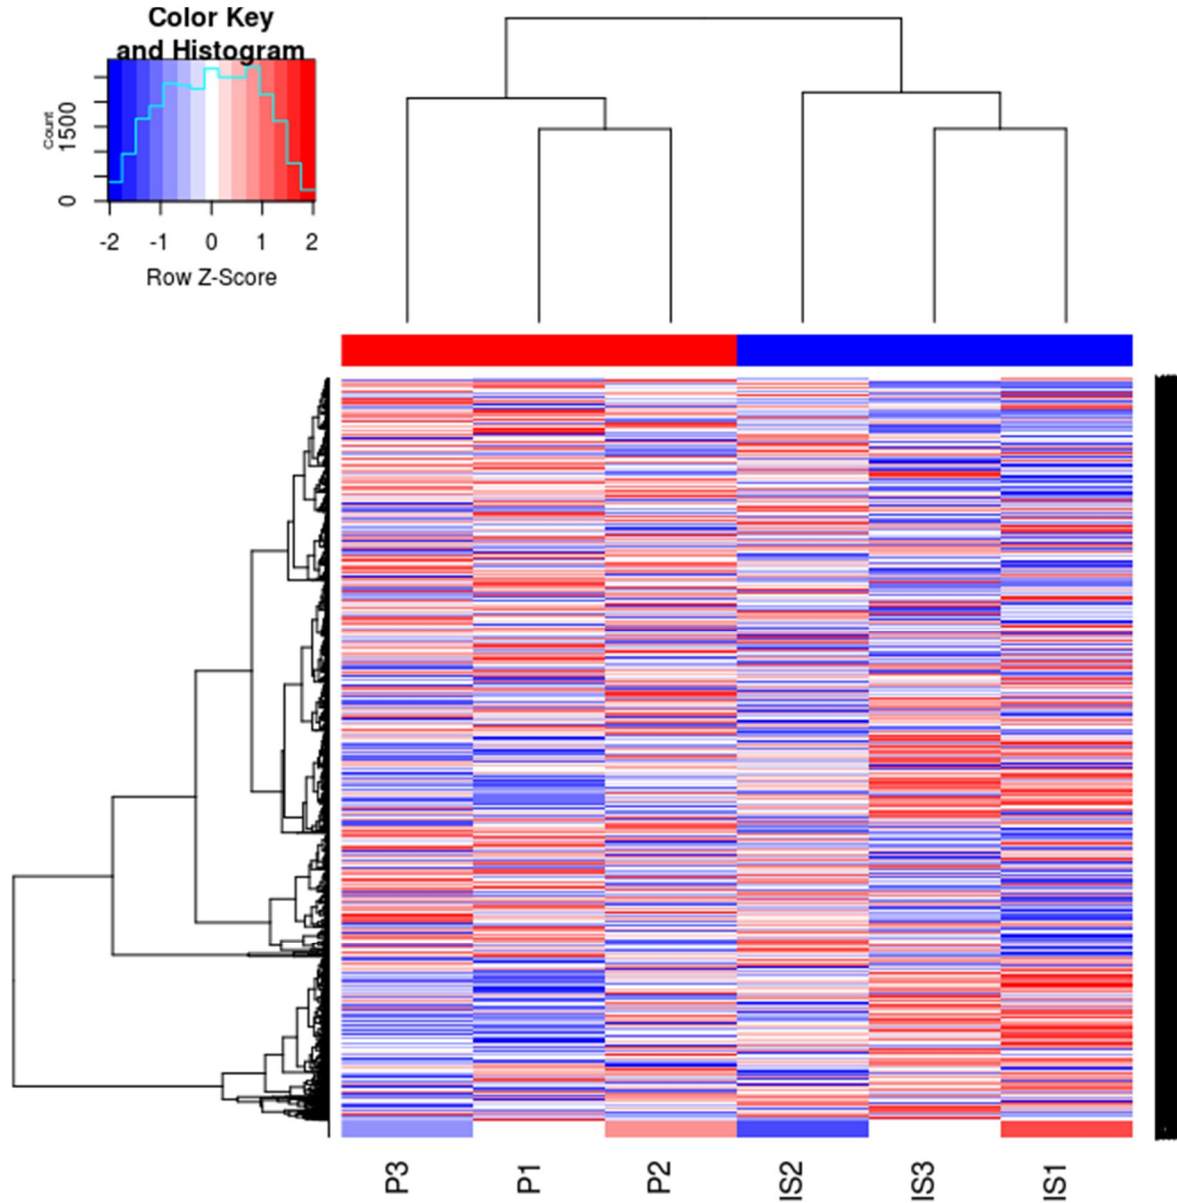

**Figure S1.** Heat map illustrating the expression level of each annotated gene of *E. coli* MG1655 carrying the control plasmid (samples P1-3) or the IS-silencing plasmid (samples IS1-3).

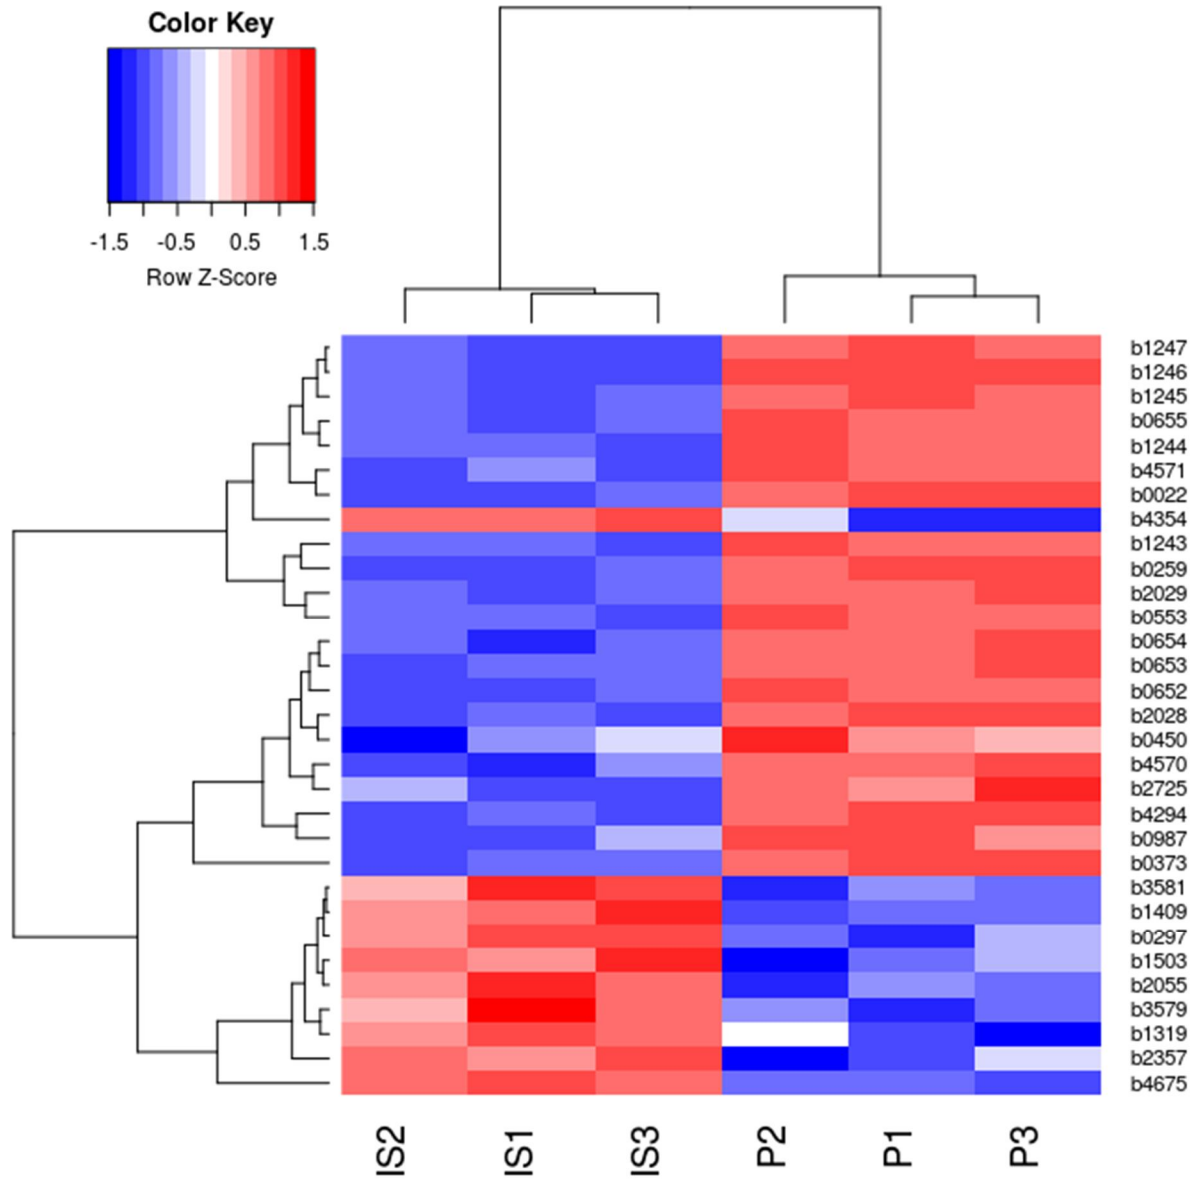

**Figure S2.** Heat map illustrating the expression level of differentially expressed genes (>2-fold change,  $p < 0.05$ ) of *E. coli* MG1655 carrying the control plasmid (samples P1-3) or the IS-silencing plasmid (samples IS1-3).

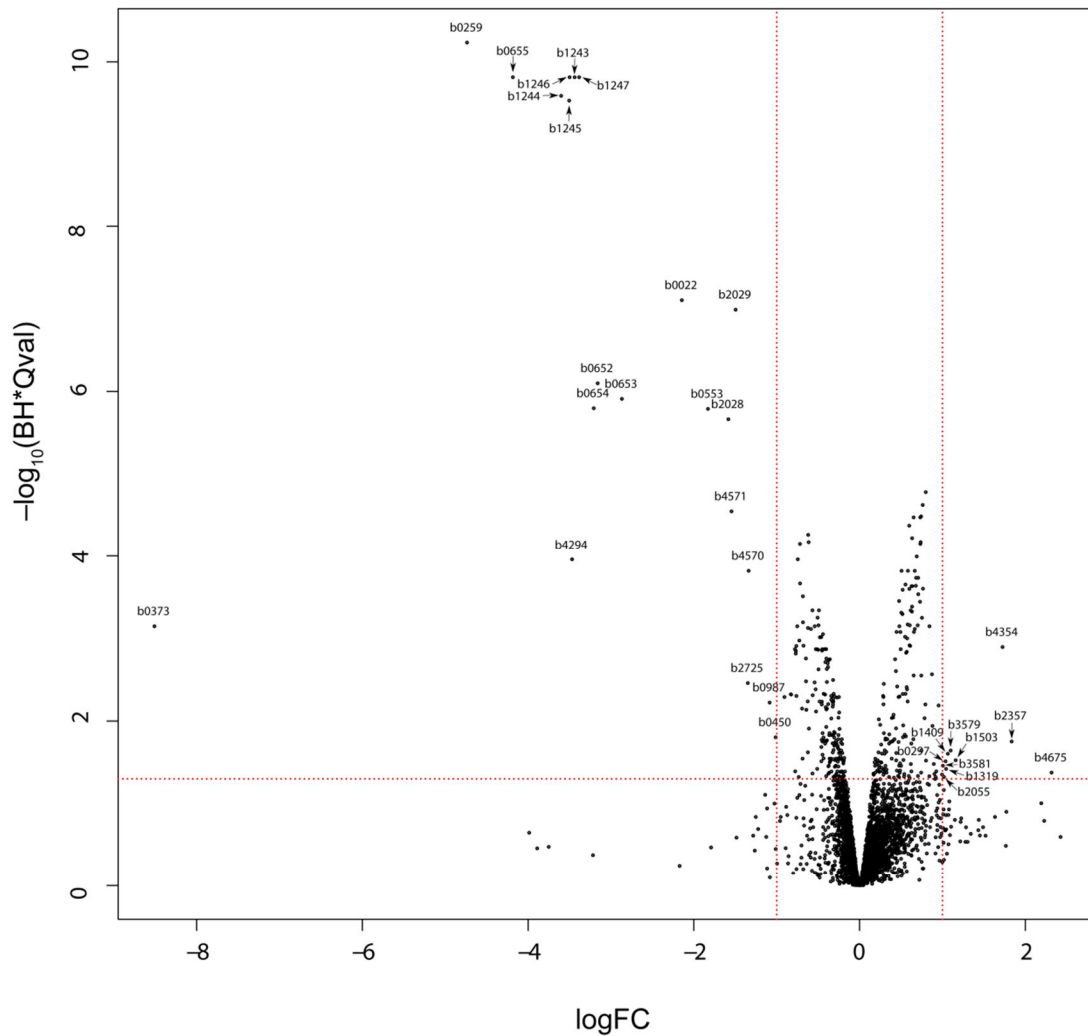

**Figure S3.** Volcano plot illustrating the differences detected in the expression levels of each annotated gene of *E. coli* MG1655 when exchanging the pCRISPath plasmid for pCRIS. Each dot represents the data for a single gene. The x-axis marks the  $\log_2$  values of the fold-changes in read frequencies, the y-axis marks the result of the statistical analysis of the changes seen in expression ( $-\log_{10}(\text{BH} * \text{Qval})$ ). Genes significantly downregulated (upper left section, demarked by red dotted lines) or significantly upregulated (upper right section, demarked by red dotted lines) are identified with their respective b-numbers.

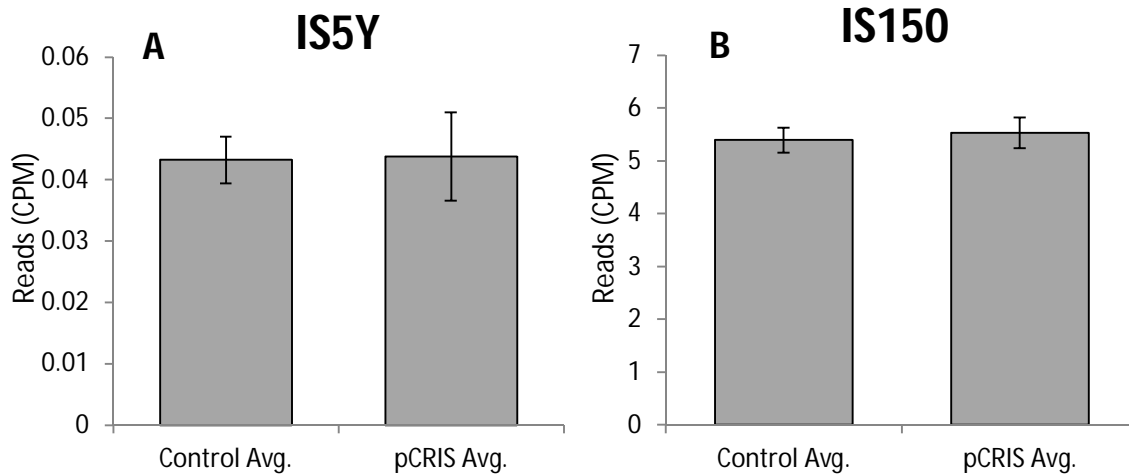

**Figure S4.** Transcriptional changes of IS5Y (A) and IS150 (B) in *E. coli* K-12 MG1655 caused by the propagation of the pCRIS plasmid. The control was obtained by propagating the pCRISPath plasmid. The figure displays the frequency of Illumina sequencing reads mapping to the given target. Error bars represent SD,  $n = 3$ . CPM: counts per million reads

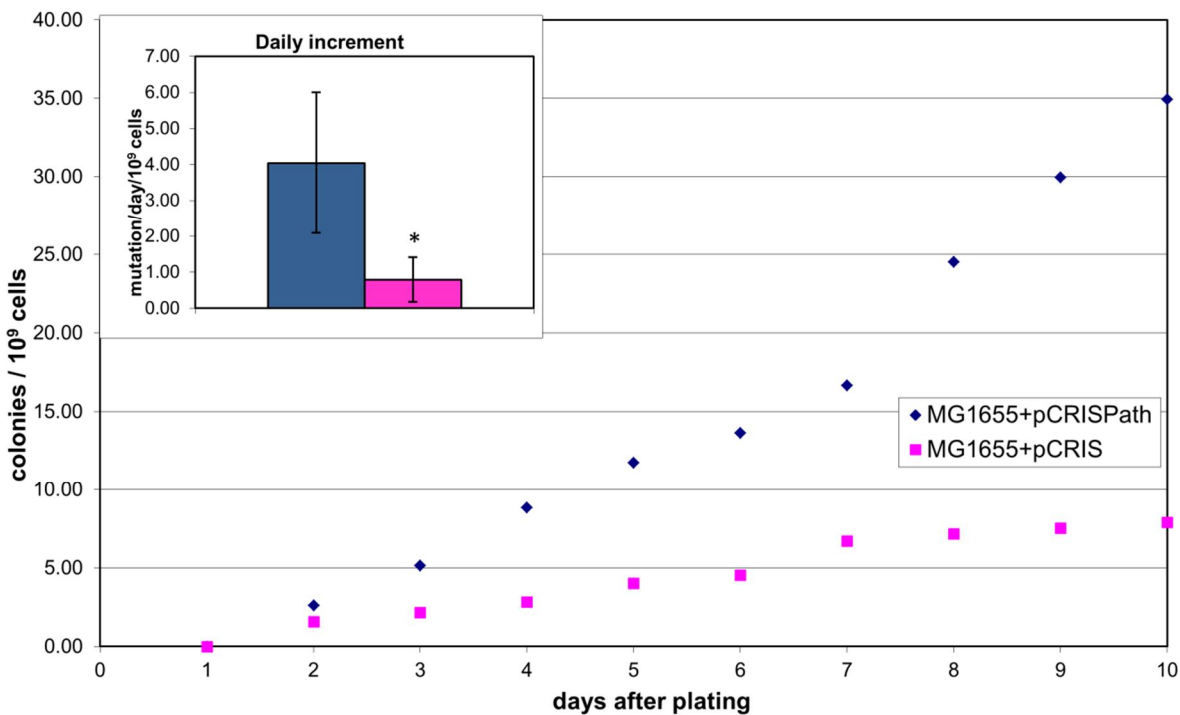

**Figure S5.** Effect of IS-knockdown on mutations activating the *bgl* operon. The accumulation of salicin-assimilating cells in *E. coli* MG1655 carrying the control plasmid pCRISPath (blue diamonds) or the IS-silencing plasmid pCRIS\_ISF (magenta squares) is depicted. The inset shows the mean daily increments of the two strains calculated from the same dataset. \*  $p < 10^{-3}$  using a t-test.

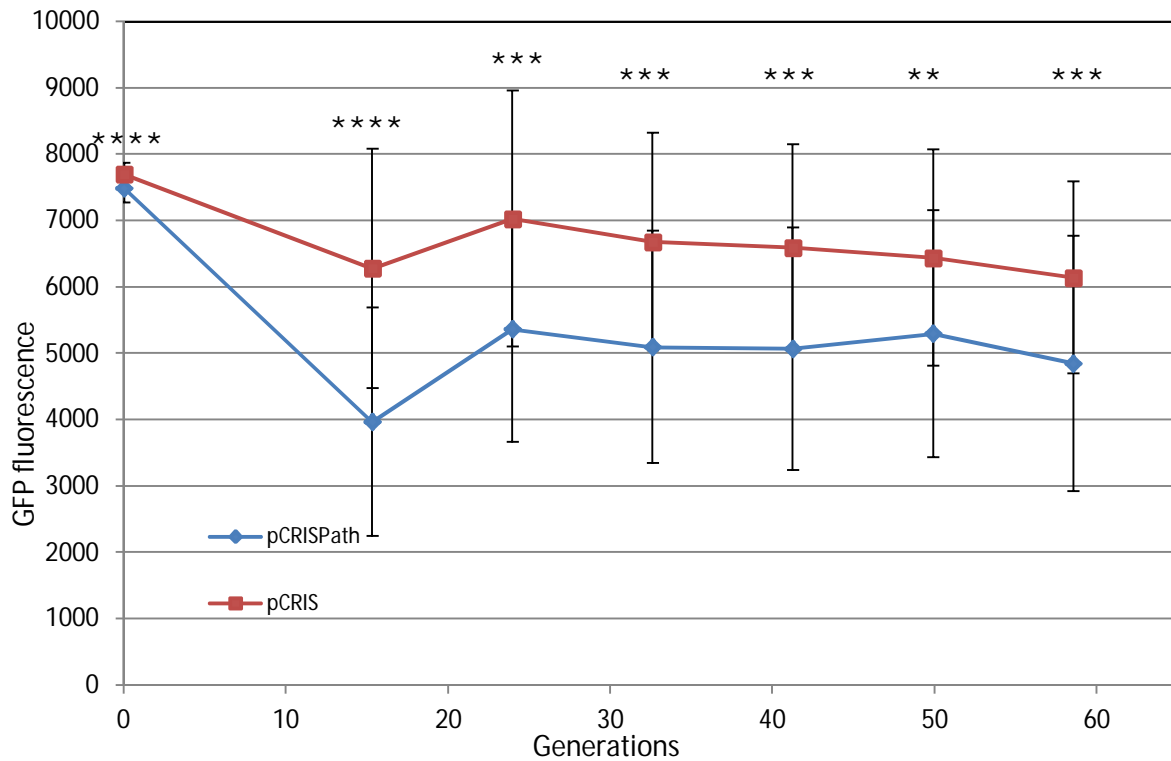

**Figure S6.** Evolutionary Experiment measuring plasmid stability in *E. coli* DH5 $\alpha$ Z1. 48-48 cultures of *E. coli* DH5 $\alpha$ Z1 carrying the control plasmid (blue diamonds) or the IS-silencing plasmid (red squares) were grown in a microplate. Green fluorescence was monitored to obtain the peak fluorescence values for each well. The means of the peak fluorescence values were calculated for each cell line and were compared for the two lines using unpaired, two-tailed t-tests. Levels of significance: \* $p < 5 \times 10^{-2}$ , \*\* $p < 5 \times 10^{-3}$ , \*\*\* $p < 10^{-3}$ , \*\*\*\* $p < 10^{-4}$ . Error bars represent SD,  $n=48$ .



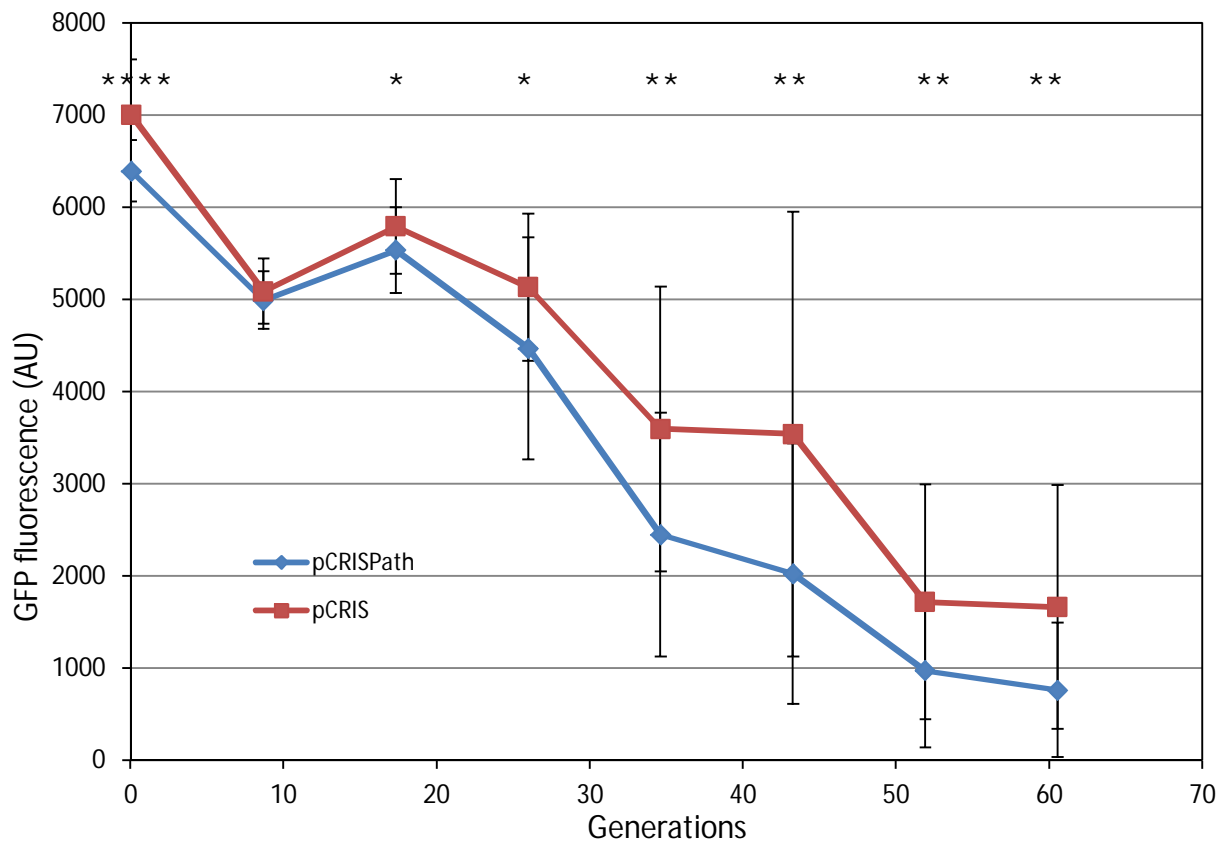

**Figure S7.** Evolutionary Experiment measuring plasmid stability in *E. coli* JM107MA2. 32-32 cultures of *E. coli* JM107MA2 carrying the control plasmid (blue diamonds) or the IS-silencing plasmid (red squares) were grown in a microplate. Green fluorescence was monitored to obtain the peak fluorescence values for each well. The means of the peak fluorescence values were calculated for each cell line and were compared for the two lines using unpaired, two-tailed t-tests. Levels of significance: \* $p < 5 \times 10^{-2}$ , \*\* $p < 10^{-2}$ , \*\*\* $p < 10^{-4}$ . Error bars represent SD,  $n=32$ .

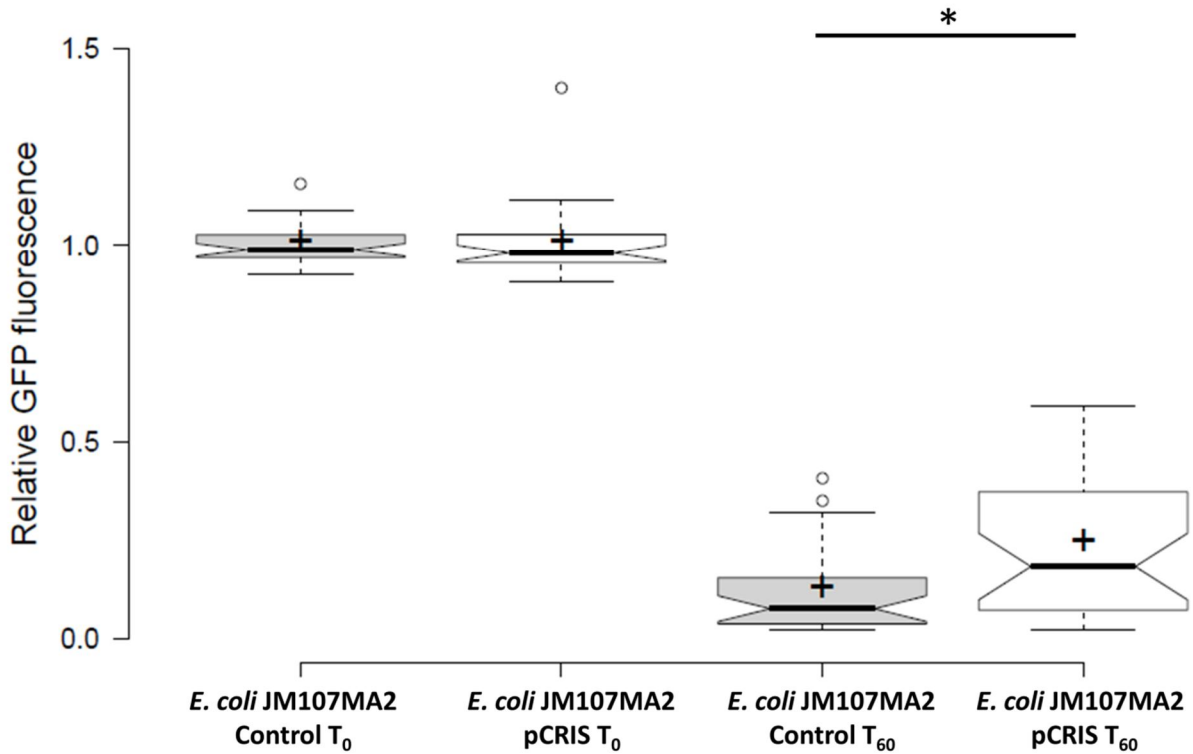

**Figure S8.** The effect of IS-silencing on plasmid stability in *E. coli* JM107MA2. The peak fluorescence distributions of 32 parallel cultures of *E. coli* JM107MA2 carrying the control plasmid and 32 cultures carrying the IS-knockdown plasmid are compared on day 2 and day 9 of Evolutionary Experiment 3, normalized by the respective mean values of day 2. Center lines show the medians; box limits indicate the 25th and 75th percentiles as determined by R software; whiskers extend 1.5 times the interquartile range from the 25th and 75th percentiles, outliers are represented by dots; crosses represent sample means.  $n=32$  sample points. \* marks the significant difference of the means ( $p < 0.05$ ) using a Mann-Whitney U-test.

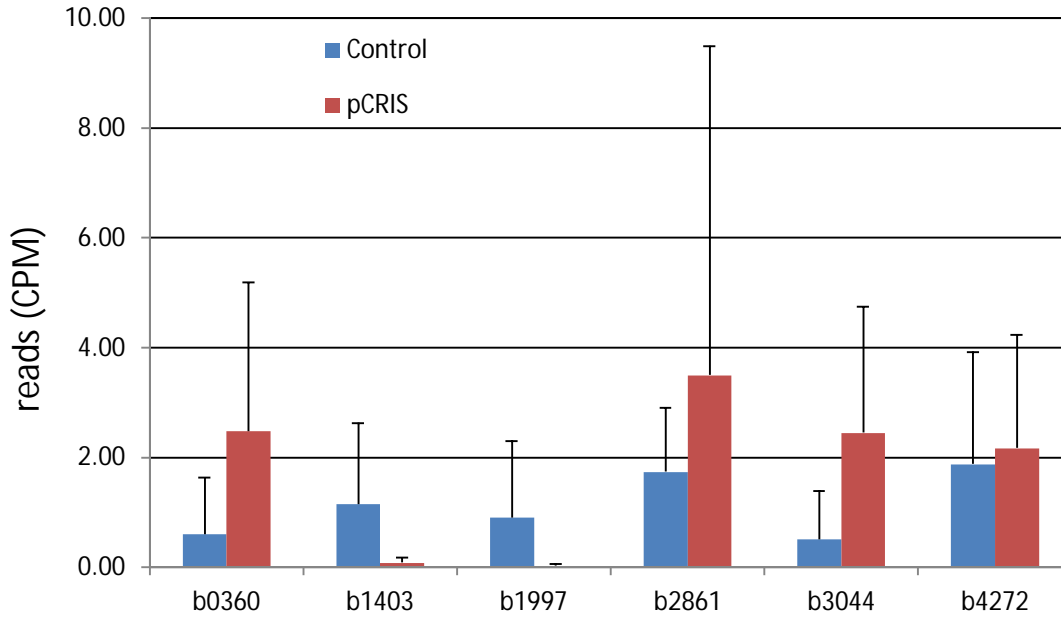

**Figure S9.** Expression of the *insC* gene of IS2 elements in *E. coli* MG1655. The x axis shows the *insC* genes of distinct IS2 elements of *E. coli* MG1655, represented by their b-numbers, the y axis displays their expression in the presence of pCRISPath (control) or the presence of the IS-silencing plasmid (pCRIS). Error bars represent SD values of 3 parallel measurements.

**A**

Predicted promoter for IS1A, IS1B, IS1D:

GGTGATGCTGCCAACTTACTGATTTAGTGTATGATGGTGT  
 -35 -10

Predicted promoter for IS1F:

GGTATGCTGCCAACTTACTGATTTAGTGTATGATGGTGA  
 -35 -10

**B**

Predicted promoter for IS5:

AAGTCCTGATATGAGATCATGTTTGTCATCTGGAGCCATA  
 -10

Predicted promoter for IS5Y:

AAGTTCCTGATATGAGATCATCATATTCATCCGGAGCGCAT  
 -10

**Figure S10.** Predicted promoters of IS1 and IS5 targeted by CRISPRi. (A) The promoter of IS1A and IS1F, (B) the promoter of IS5 and IS5Y. The -10 and -35 boxes are underlined. Sequence polymorphisms are indicated in red. Green boxes mark the segments targeted by the crRNA, with the PAM sequences indicated in bold.

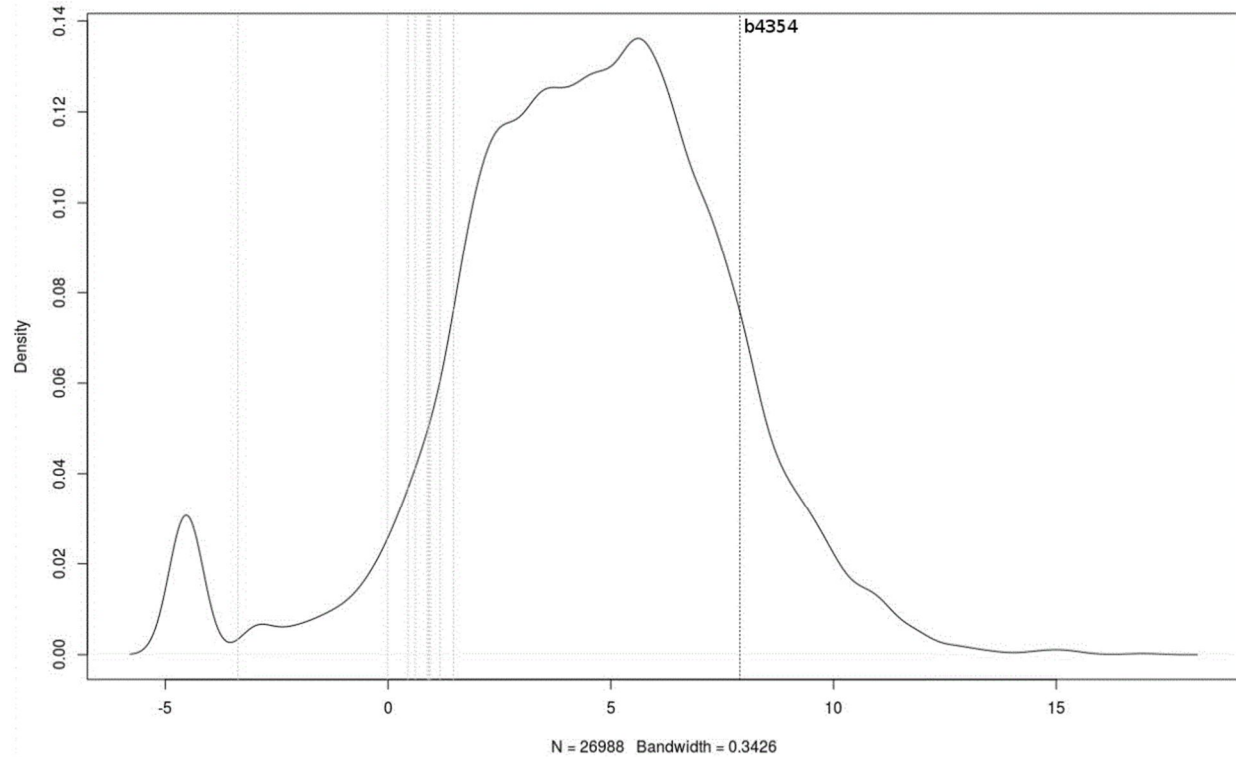

**Figure S11.** Distribution of expression levels for the gene set of *E. coli* K-12 MG1655, as observed in the RNA-sequencing analysis of this study. Vertical dotted lines mark the genes displaying increased expression in the presence of pCRIS. The expression level of b4354 is specifically marked.

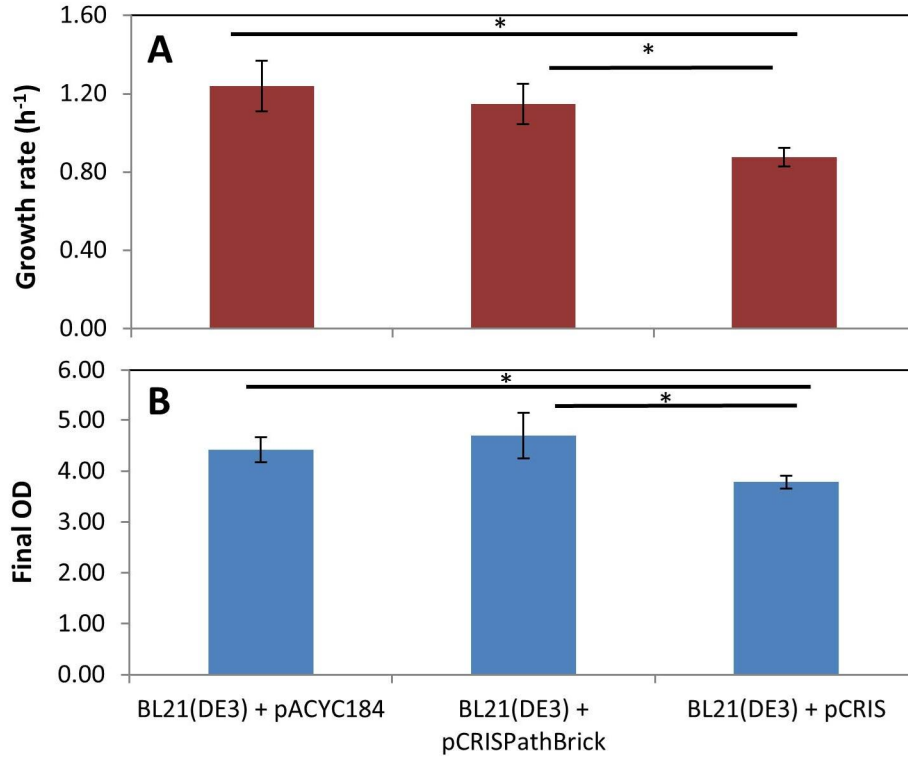

**Figure S12.** Effect of pCRIS on the growth of *E. coli* in a flask. Growth parameters of *E. coli* BL21(DE3) carrying plasmid pACYC184, pCRISPathBrick or pCRIS, observed in 100 ml of LB+Cm medium at 37 °C, in a flask and shaker system are shown. (A) growth rate; (B) final optical density, measured at 550 nm. Error bars mark SD. \* marks the significant difference of the means ( $p < 0.05$ ) using an unpaired, two-tailed t-test ( $n=3$ ).

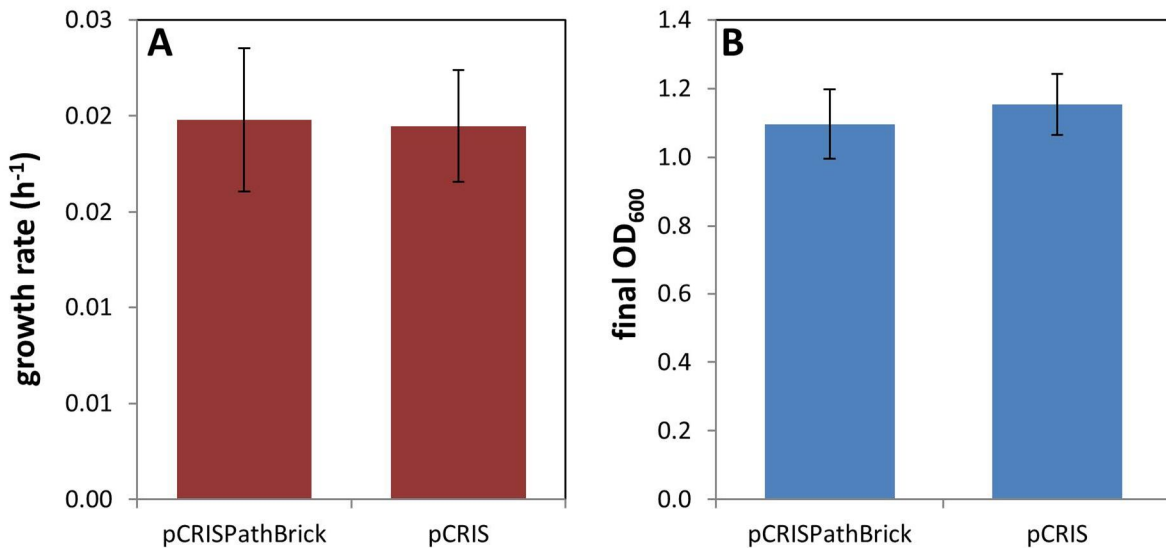

**Figure S13.** Effect of pCRIS on the growth of *E. coli* in microplate wells. Growth parameters of *E. coli* JM107MA2 carrying pBDP\_Km\_GFP5 and either the pCRISPathBrick or the pCRIS plasmid are shown, measured in 200 ul of LB+Cm+Km+IPTG medium at 37 °C, in a microplate shaker/incubator system. (A) growth rate; (B) final optical density, measured at 600 nm. Error bars mark SD (n=32).

## Supplementary Note I. Transcriptomics analysis

Regarding the transcriptomics dataset, we were most interested in the specificity of the gene-silencing activity of pCRIS. We divided the specificity issue to two phenomena: transcriptional repression of IS subtypes, and transcriptional modulation of non-IS genes.

### *A) Transcriptional repression of IS subtypes*

The following IS elements were targeted in *E. coli* K-12 MG1655: four copies of IS 1A (GenBank Acc. No.: X52534), two of IS 1B (X17345), one each of IS 1D (X52536) and IS 1F (X52538), five of IS 3 (X02311), eleven of IS 5 (J01735), and one each of IS 5Y (HM000058.1) and IS 150 (X07037). A custom-masked *E. coli* K12 MG1655 genome version (based on U00096.3, harbouring only one copy from each relevant IS group: IS 1A, IS 1F, IS 3, IS 5, IS 5Y, and IS 150) was used to map RNA-seq reads. This approach generated a direct readout of these six IS groups as six pools, besides leaving the possibility to investigate the transcription of each further ORF. The active IS 1 copies (IS 1A, IS 1B, IS 1D) were pooled to a single group this way due to their high level of identity (>98 %). The five copies of IS 3 as well as the 11 copies of IS 5 are >99 % identical and binned to the IS 3 and IS 5 groups, respectively. IS 5Y, however, displays a mere 89.8 % identity with IS 5 and was therefore treated separately. IS 1F, presumed to be inactive, has only a ~90 % identity with the IS 1A group, and was also mapped separately. **Figure 1** indicates that the transcription of both the IS 1A group and IS 1F were effectively silenced. This was expected despite their mere 90% sequence identity due to the highly conserved promoter. Note that the CRISPR spacer targets completely identical segments of the two elements (**Figure S10A**). IS 5Y, however, was not silenced (**Figure S4**). The promoter segment of IS 5Y displayed 6 mismatches with the CRISPR spacer (**Figure S10B**). Albeit these mismatches were at the PAM-distal end of the spacer, they most likely inhibited efficient binding of the dCas machinery to this element. The extremely small transcription level of this IS element (**Figure S4**) impedes the proper assessment of its silencing, and strongly reduces its importance, as well.

The case of IS 150 is more puzzling: although the dramatic reduction was seen in its activity in the presence of pCRIS (see main text), this IS generated an equally high number of transcripts in both the control and the IS-knockdown samples. The unaffected mRNA levels indicate that the P1 promoter of IS 150, targeted in this work has a negligible role in the transcription of the respective transposase. This may suggest that the P2 promoter, lying downstream of P1 is the functional promoter of IS 150, despite its overlap with the start codon (1).

### B) *Transcriptional modulation of non-IS genes*

The transcriptomics analysis revealed 31 genes that displayed a statistically significant and at least two-fold rate of downregulation in the latter strain (**Table S2, S3, Figure S3**). Four of these genes are the coding regions of IS elements themselves, as indicated in **Table S2**. Of the remaining 17 downregulated genes, 14 lie in the proximity of an IS5 and one is adjacent to an IS1D, their silencing can therefore be regarded as cis-effects on transcription. In two cases, (*gtf* and *opp*) entire operons were downregulated due to the silencing of the upstream IS5. The two remaining silenced genes encode a nitrogen-regulatory protein (*glnK*) and a transcription factor (*hycA*). The downregulation of the latter can potentially be explained by a 9 bp segment (AAGTTGGCA) lying 65 bp upstream of its start codon showing identity to the IS1-specific spacer, but no such homology could be found in the vicinity of the former. Even the 9 bp match seems to be too short to explain dCas binding, based on earlier studies (2, 3).

In addition to downregulation, pCRIS caused the significant upregulation of ten genes listed in **Table S3**. OmpG is an outer membrane porin, YiaO is a 2,3-diketo-L-gulonate:Na<sup>+</sup> symporter - periplasmic binding protein and SgbH is 3-keto-L-gulonate-6-phosphate decarboxylase. The seven remaining genes (*eaeh*, *ynbB*, *ydeR*, *wcaE*, *yfdT*, *lgoR*, *yoaJ*) are assigned with only putative functions yet. The most plausible explanation for gene upregulation by dCas9 expression would be the indirect effect of silencing a repressor, such as *hycA*. None of the upregulated genes however, are known to be repressed by *hycA*. Perhaps more subtle alterations of other transcription factors are responsible for these changes. One also cannot exclude the direct positive effect of dCas binding on gene transcription by modifying the molecular milieu or the accessibility of the promoter in a way that mediates RNA synthesis. Such a cis-effect may come into play for *eaeh*, which lies directly upstream of an IS3. The binding of dCas may also influence distal gene expression by trans-regulatory effects resulting from the 3D structural properties of prokaryotic chromosomes, as assumed for numerous transcription factors based on the periodicity of their targets (4). It is also possible, that the binding of a novel proteinaceous factor (dCas) to the genome of *E. coli* at 26 loci initiates a general and yet unknown response, embodied by the induction of some of these genes. Finally, the most plausible cause for the seeming overexpression of these genes is experimental noise. It is apparent from the volcano plot (**Figure S3**) that apart from b4354, all overexpressed genes lie close to the limit of statistical significance. Seven of these barely surpass the thresholds of 2-fold change in expression and 0.05 of FDR (false discovery rate). The corresponding region on the volcano plot among the downregulated genes is practically empty, for those genes mostly display a higher fold change in expression with a higher level of significance. Within this latter



set, the two genes non-proximal to ISes (*glnK* and *hycA*) are nevertheless also among the three least repressed genes with the lowest significance (b0450 and b2725 on the plot). In addition, observing the mean expression level of the upregulated genes (**Figure S11**), it is apparent that these genes are extremely weakly expressed, again with the exception of b4354. Their expression levels fall close to the RNA-Seq detection limit being largely influenced by technical noise. After manually revising the differential gene expression hit lists we consider most of the genes non-proximal to ISes as technical false positive hits.

Overall, out of the 28 ISes targeted among the 4286 genes of *E. coli*, 27 was successfully downregulated (the single copy of IS150 was the exception). Out of the 31 non-IS genes that displayed an altered expression, only 12 could not be easily explained by the cis-effects of dCas-binding. Therefore, less than 0.3% of the *E. coli* gene set seems to have responded in an unexplained manner to pCRIS, which in our interpretation is the characteristic of very high specificity.

#### Supplementary Note II. Inhibition of IS-transposition

Evaluation of the effects of pCRIS on the mRNA levels and the transposition activity of IS elements shed light on two interesting phenomena. First, it became obvious from our results that transcriptional downregulation is not a prerequisite of IS-silencing. Namely, pCRIS nearly completely eliminated the mobility of IS150 despite its unchanged mRNA levels. We speculate that the mere steric inhibition of transposase access to the left IR of the IS was sufficient to inhibit transposition. Further experiments (e.g. targeting the right IR of ISes) would be needed to verify this assumption.

Second, our most surprising finding was the significant downregulation of IS2 transposition to the *km-gfp* cassette of pBDP\_Km\_GFP5, despite the lack of CRISPR spacers targeting the IS2 element. We hypothesized that one or more of the crRNA species expressed by pCRIS may bind to IS2, and inhibit its expression. This explanation was discarded, since the mRNA levels of the IS2 transposases displayed no consistent change upon pCRIS transformation (**Figure S9**). We have seen for IS150 however, that IS mobility can be repressed without transcriptional silencing, we therefore searched for possible base-pairing between IS2 and any of the four CRISPR spacers of pCRIS. The longest match found was a 9 bp identity between the IS1-specific spacer and the middle (600-608 nt coordinates) of IS2 (GCTGCCAAC). Based on earlier studies (2, 3), we strongly question whether a spacer of this length, without a proper PAM sequence could explain the potential binding of dCas9 to IS2. We

therefore turned to our third hypothesis, attributing our observations to a novel phenomenon we refer to as “transposase cross-reactivity”. Namely, IS2, IS3 and IS150 all belong to the IS3 family of ISes. If we assume that their transposases cross-react with each other, the successful transcriptional repression of IS3 could lead to a lessened mobility of IS2, and perhaps IS150 as well. Further experimental evidence supporting this hypothesis is being collected at this time, and will be published in a separate study.

- [1] Schwartz, E., Kroger, M., and Rak, B. (1988) IS150: distribution, nucleotide sequence and phylogenetic relationships of a new *E. coli* insertion element. *Nucleic Acids Res.*, 16, 6789-6802.
- [2] Bikard, D., Jiang, W., Samai, P., Hochschild, A., Zhang, F., and Marraffini, L.A. (2013) Programmable repression and activation of bacterial gene expression using an engineered CRISPR-Cas system. *Nucleic Acids Res.*, 41, 7429-7437.
- [3] Jiang, W., Bikard, D., Cox, D., Zhang, F., and Marraffini, L.A. (2013) RNA-guided editing of bacterial genomes using CRISPR-Cas systems. *Nat. Biotechnol.*, 31, 233-239.
- [4] Bouyioukos, C., Elati, M., and Képès, F. (2016) Analysis tools for the interplay between genome layout and regulation. *BMC Bioinformatics*, 17, 191.
